# Supplementary material
Source: HighWire-hosted journal article supplement (https://www.cmajopen.ca/content/suppl/2021/05/06/9.2.E474)

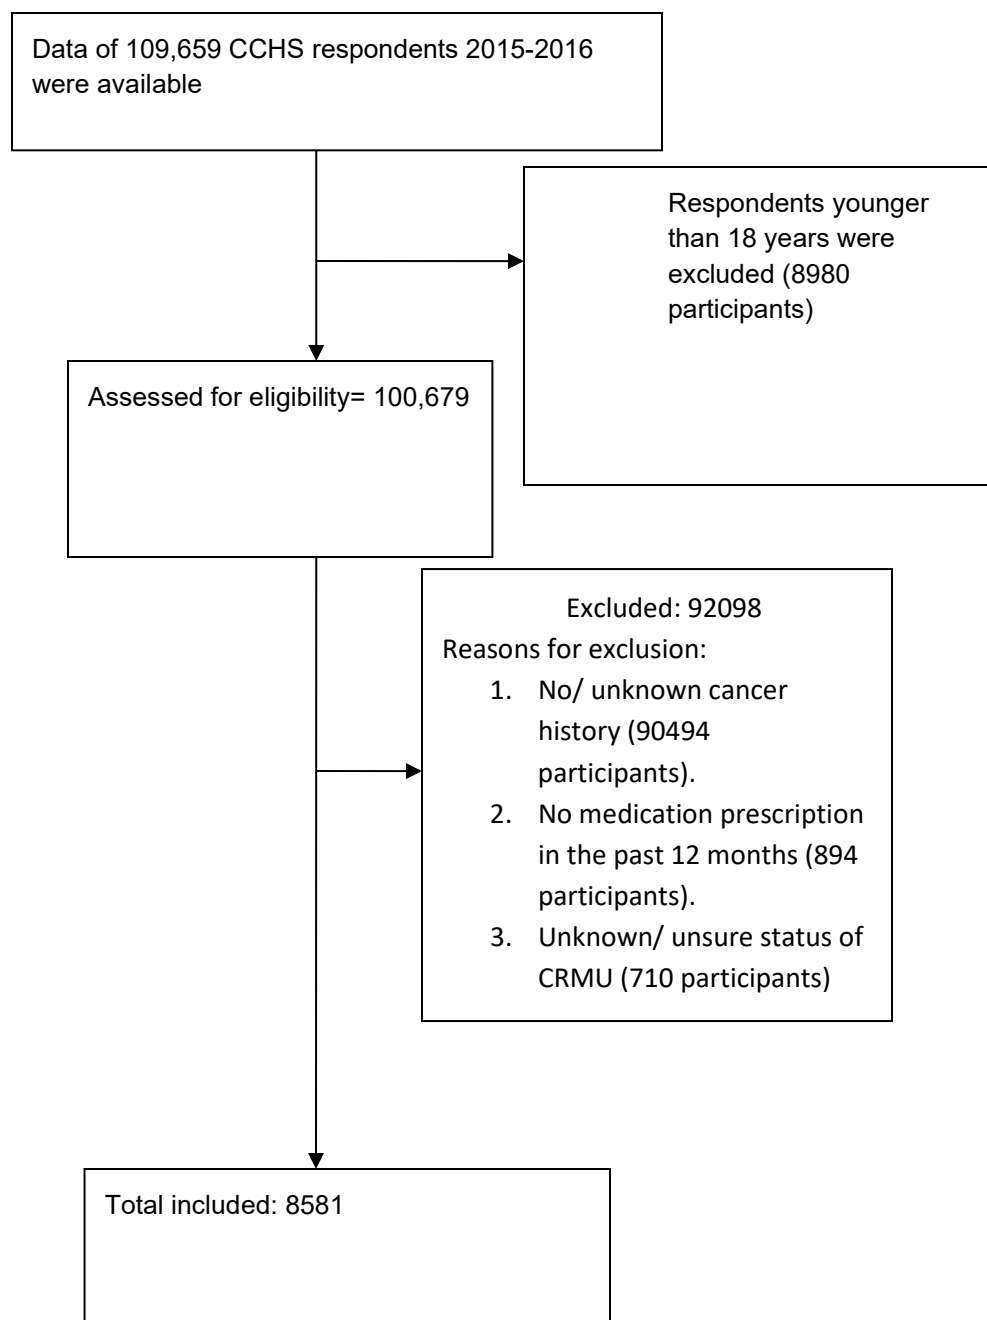

Supplementary figure-1: Flowchart of Participants' selection process.

Supplement: 2020-0186-1-at.pdf [file 2020-0186-1-at.pdf]
